# Supplementary material for: Phytochemical Investigation and Biological Studies on Selected Searsia Species
Source: MDPI journal article supplement (doi:10.3390/plants11202793), 2022-10-21
Supplement: s1 [file s1]

# Phytochemical Investigation and Biological Studies on Selected *Searsia* Species.

Mkhuseli Koki <sup>1</sup>, Masande Yalo <sup>1,2</sup>, Masixole Makhaba <sup>1,3</sup>, Ndikho Nako <sup>1</sup>, Fanie Rautenbach <sup>4</sup>, Jelili A. Badmus <sup>4</sup>, Jeanine Marnewick <sup>4</sup> Ahmed A. Hussein <sup>3,\*</sup>, Wilfred T. Mabusela <sup>1,\*</sup>

<sup>1</sup> Department of Chemistry, University of the Western Cape, Private Bag X17, Bellville 7538, South Africa

<sup>2</sup> Department of Pharmacology, Faculty of Health Sciences, University of Free State, Bloemfontein, 9300, South Africa.

<sup>3</sup> Chemistry Department, Cape Peninsula University of Technology, Symphony Rd., Bellville 7535, South Africa

<sup>4</sup> Applied Microbial and Health Biotechnology Institute, Cape Peninsula University of Technology, Symphony Rd., Bellville 7535, South Africa

\* Correspondence: Correspondence: mohammedam@cput.ac.za (A.A.H.);  
wmabusela@uwc.ac.za (W.T.M.);  
Tel.: +27-(0)-21-959-6193 (A.A.H.); +27-(0)-21-959-3052 (W.T.M.);  
Fax: +27-(0)-21-959-1281 (W.T.M.)

## Moronic acid (1) and 21 $\beta$ -hydroxylolean-12-en-3-one (2)

**Table S1:** <sup>1</sup>H (400 MHz) and <sup>13</sup>C (100 MHz) NMR spectral data of C1 and C2 in CDCl<sub>3</sub>

| No.             | C1                   |            | C2                         |            |
|-----------------|----------------------|------------|----------------------------|------------|
|                 | $\delta_H$ (mult, J) | $\delta_C$ | $\delta_H$ (mult, J)       | $\delta_C$ |
| 1               | 1.98 (m)             | 39.8       |                            | 39.9       |
| 2               | 2.40 (m)             | 33.8       | 1.90 (m)                   | 34.2       |
| 3               |                      | 218.3      | 2.41 (m)                   | 217.8      |
| 4               |                      | 47.3       |                            | 47.6       |
| 5               | 1.39(m)              | 55.3       |                            | 55.3       |
| 6               | 1.38 (m)             | 19.6       | 1.33 (m)                   | 19.6       |
| 7               | 2.49 (m)             | 33.9       | 1.51 (m)                   | 33.8       |
| 8               |                      | 40.6       | 2.37 (m)                   | 41.3       |
| 9               | 1.39 (m)             | 50.5       |                            | 50.6       |
| 10              |                      | 36.8       | 1.34 (m)                   | 37.1       |
| 11              | 1.33 (m)             | 21.4       |                            | 20.1       |
| 12              | 1.28 (m)             | 26.0       | 1.46 (m)                   | 122.4      |
| 13              | 2.27(m)              | 41.6       | 5.33 t, J = 7.08 Hz        | 143.6      |
| 14              |                      | 42.6       |                            | 41.7       |
| 15              | 1.27 (m)             | 29.3       |                            | 29.7       |
| 16              | 1.48 (m)             | 33.7       | 1.27 (m)                   | 29.6       |
| 17              |                      | 47.9       | 1.36 (m)                   | 36.7       |
| 18              |                      | 136.6      |                            | 46.8       |
| 19              | 5.19 (s)             | 132.4      | 0.78 (m)                   | 45.8       |
| 20              |                      | 32.1       | 1.19 (m)                   | 36.7       |
| 21              | 2.22 (t)             | 33.4       |                            | 78.9       |
| 22              | 2.19 (t)             | 33.3       | 3.22 dd, J = 11,2; 5.3 Hz) | 45.2       |
| 23              | 1.05 (3H, s)         | 20.9       | 1.19 (m)                   | 23.6       |
| 24              | 1.09 (3H, s)         | 26.8       | 0.96 3H, (s)               | 26.4       |
| 25              | 1.04 (3H, s)         | 15.8       | 0.86 (3H, s)               | 15.4       |
| 26              | 0.97 (3H, s)         | 16.7       | 0.79 (3H, s)               | 16.8       |
| 27              | 0.81 (3H, s)         | 14.8       | 0.84 (3H, s)               | 25.8       |
| 28              |                      | 181.3      | 1.10 (3H, s)               | 27.8       |
| 29              | 0.99 (3H, s)         | 29.1       | 0.99 (3H, s)               | 28.0       |
| 30              | 1.02 (3H, s)         | 30.4       | 0.98 (3H, s)               | 15.3       |
| C=O             |                      |            | 0.79 (3H, s)               |            |
| CH <sub>3</sub> |                      |            |                            |            |

**Myricetin-3-*O*-β-galactopyranoside (3) and Rutin (4)**

**Table S2:** <sup>1</sup>H (400 MHz) and <sup>13</sup>C (100 MHz) NMR spectral data of **C3** and **C4** in CDOD<sub>3</sub>

| <b>C3</b>                |                                              |                      | <b>C4</b>                                    |                      |
|--------------------------|----------------------------------------------|----------------------|----------------------------------------------|----------------------|
| <b>No.</b>               | <b>δ<sub>H</sub> (<i>mult</i>, <i>J</i>)</b> | <b>δ<sub>C</sub></b> | <b>δ<sub>H</sub> (<i>mult</i>, <i>J</i>)</b> | <b>δ<sub>C</sub></b> |
| <b>2</b>                 |                                              | 157.2                |                                              | 157.1                |
| <b>3</b>                 |                                              | 134.5                |                                              | 134.3                |
| <b>4</b>                 |                                              | 177.9                |                                              | 178.0                |
| <b>5</b>                 |                                              | 161.6                |                                              | 161.5                |
| <b>6</b>                 | 6.2 ( <i>d</i> , <i>J</i> = 2.08 Hz)         | 98.4                 | 6.23 ( <i>d</i> , <i>J</i> = 2.04 Hz)        | 98.6                 |
| <b>7</b>                 |                                              | 164.6                |                                              | 164.6                |
| <b>8</b>                 | 6.39 ( <i>d</i> , <i>J</i> = 1.92 Hz)        | 93.2                 | 6.42 ( <i>d</i> , <i>J</i> = 2.04 Hz)        | 93.5                 |
| <b>9</b>                 |                                              | 156.9                |                                              | 158.0                |
| <b>10</b>                |                                              | 105.7                |                                              | 104.2                |
| <b>1`</b>                |                                              | 120.2                |                                              | 121.7                |
| <b>2`</b>                | 7.38 <i>s</i> )                              | 108.5                | 6.89 ( <i>d</i> , <i>J</i> = 8.5 Hz)         | 114.7                |
| <b>3`</b>                |                                              | 144.9                |                                              | 144.3                |
| <b>4`</b>                |                                              | 136.7                |                                              | 148.4                |
| <b>5`</b>                |                                              | 144.9                | 7.69 ( <i>d</i> , <i>J</i> = 2.1 Hz)         | 116.3                |
| <b>6`</b>                | 7.38 ( <i>s</i> )                            | 108.5                | 7.65 ( <i>dd</i> , <i>J</i> = 8.4, 2.1 Hz)   | 122.2                |
| <b>galactopyranoside</b> |                                              |                      | <b>glucose</b>                               |                      |
| <b>1``</b>               | 5.21 ( <i>d</i> , <i>J</i> = 7.8 Hz)         | 104.1                | 5.09 ( <i>d</i> , <i>J</i> = 7.6 Hz)         | 103.6                |
| <b>2``</b>               | 3.82                                         | 71.2                 | 3.52                                         | 74.2                 |
| <b>3``</b>               |                                              | 73.2                 | 3.44                                         | 76.7                 |
| <b>4``</b>               | 3.87 ( <i>d</i> , <i>J</i> = 3.36 Hz)        | 68.6                 | 3.29                                         | 69.9                 |
| <b>5``</b>               | 3.49                                         | 75.8                 |                                              | 75.7                 |
| <b>6``</b>               |                                              | 60.5                 |                                              | 67.1                 |
|                          |                                              |                      | <b>rhamnose</b>                              |                      |
| <b>1'''</b>              |                                              |                      | 4.54 ( <i>d</i> , <i>J</i> = 1.2 Hz)         | 101.0                |
| <b>2'''</b>              |                                              |                      |                                              | 70.6                 |
| <b>3'''</b>              |                                              |                      | 3.55 ( <i>d</i> , <i>J</i> = 2.3 Hz)         | 70.8                 |
| <b>4'''</b>              |                                              |                      | 3.30                                         | 72.5                 |
| <b>5'''</b>              |                                              |                      | 3.46 ( <i>d</i> , <i>J</i> = 2.4 Hz)         | 68.3                 |
| <b>6'''</b>              |                                              |                      | 1.15 ( <i>d</i> , <i>J</i> = 6.2 Hz)         | 17.0                 |

**Quercetin (5)**

**Table S3:**  $^1\text{H}$  (400 MHz) and  $^{13}\text{C}$  (100 MHz) NMR spectral data of compound **C5** in  $\text{CD}_3\text{OD}$

| No.         | $\delta_{\text{H}}$ ( <i>mult</i> , <i>J</i> ) | $\delta_{\text{C}}$ |
|-------------|------------------------------------------------|---------------------|
| <b>2</b>    |                                                | 147.4               |
| <b>3</b>    |                                                | 135.8               |
| <b>4</b>    |                                                | 175.9               |
| <b>5</b>    |                                                | 161.1               |
| <b>6</b>    | 6.08 ( <i>d</i> , <i>J</i> = 2.04 Hz)          | 97.8                |
| <b>7</b>    |                                                | 164.2               |
| <b>8</b>    | 6.29 ( <i>d</i> , <i>J</i> = 2.12 Hz)          | 92.9                |
| <b>9</b>    |                                                | 156.8               |
| <b>10</b>   |                                                | 103.1               |
| <b>1'</b>   |                                                | 122.7               |
| <b>2'</b>   | 7.63 ( <i>d</i> , <i>J</i> = 2.16 Hz)          | 114.8               |
| <b>3'</b>   |                                                | 144.8               |
| <b>4'</b>   |                                                | 146.6               |
| <b>5'</b>   | 6.79 ( <i>d</i> , <i>J</i> = 8.48 Hz)          | 114.6               |
| <b>6'</b>   | 7.54 ( <i>dd</i> , <i>J</i> = 2.16, 8.48 Hz)   | 120.2               |
| <b>5-OH</b> | 12.18, ( <i>brs</i> )                          |                     |

**Apigenin (6)**

**Table S4:**  $^1\text{H}$  (400 MHz) and  $^{13}\text{C}$  (100 MHz) NMR spectral data of compound **C6** in DMSO

| No.         | $\delta_{\text{H}}$ ( <i>mult</i> , <i>J</i> ) | $\delta_{\text{C}}$ | $\delta_{\text{C}}$ (Lit. (Owen <i>et al.</i> , 2003)) |
|-------------|------------------------------------------------|---------------------|--------------------------------------------------------|
| <b>2</b>    |                                                | 162.0               | 165.30                                                 |
| <b>3</b>    |                                                | 104.5               | 103.78                                                 |
| <b>4</b>    |                                                | 183.4               | 183.07                                                 |
| <b>5</b>    |                                                | 165.9               | 166.46                                                 |
| <b>6</b>    | 6.1 ( <i>d</i> , <i>J</i> = 1.72 Hz)           | 99.8                | 99.71                                                  |
| <b>7</b>    |                                                | 155.2               | 159.6                                                  |
| <b>8</b>    | 6.2 ( <i>d</i> , <i>J</i> = 1.8 Hz)            | 94.4                | 93.99                                                  |
| <b>9</b>    |                                                | 154.5               | 157.33                                                 |
| <b>10</b>   |                                                | 109.5               | 103.6                                                  |
| <b>1'</b>   |                                                | 121.1               | 121.17                                                 |
| <b>2'</b>   | 7.6 ( <i>d</i> , <i>J</i> = 8.84 Hz)           | 129.1               | 128.48                                                 |
| <b>3'</b>   | 7.2 ( <i>d</i> , <i>J</i> = 8.60 Hz)           | 116.4               | 115.97                                                 |
| <b>4'</b>   |                                                | 161.7               | 162.9                                                  |
| <b>5'</b>   | 7.2 ( <i>d</i> , <i>J</i> = 8.60 Hz)           | 116.4               | 115.97                                                 |
| <b>6'</b>   | 7.6 ( <i>d</i> , <i>J</i> = 8.84 Hz)           | 129.1               | 128.48                                                 |
| <b>5-OH</b> | 12.6 ( <i>s</i> )                              |                     |                                                        |

**Amentoflavone (7)**

**Table S5:** <sup>1</sup>H (400 MHz) and <sup>13</sup>C (100 MHz) NMR spectral data of compound **C7** in pyridine

| Unit I    |                                                |                     | Unit II                                        |                     |
|-----------|------------------------------------------------|---------------------|------------------------------------------------|---------------------|
| No.       | $\delta_{\text{H}}$ ( <i>mult</i> , <i>J</i> ) | $\delta_{\text{C}}$ | $\delta_{\text{H}}$ ( <i>mult</i> , <i>J</i> ) | $\delta_{\text{C}}$ |
| <b>2</b>  |                                                | 166.1               |                                                | 162.7               |
| <b>3</b>  |                                                | 102.4               |                                                | 102.4               |
| <b>4</b>  |                                                | 183.2               |                                                | 183.5               |
| <b>5</b>  |                                                | 163.02              |                                                | 162.7               |
| <b>6</b>  | 6.65 ( <i>d</i> , <i>J</i> = 2.04 Hz)          | 100.3               | 6.89 ( <i>d</i> , <i>J</i> = 8.8 Hz)           | 99.8                |
| <b>7</b>  |                                                | 165.6               |                                                | 165.4               |
| <b>8</b>  | 6.54 ( <i>d</i> , <i>J</i> = 2.04 Hz)          | 94.6                |                                                | 103.9               |
| <b>9</b>  |                                                | 155.7               |                                                | 154.5               |
| <b>10</b> |                                                | 109.4               |                                                | 109.4               |
| <b>1'</b> |                                                | 121.4               |                                                | 120.5               |
| <b>2'</b> |                                                | 129.1               | 7.88 ( <i>d</i> , <i>J</i> = 8.8 Hz)           | 129.1               |
| <b>3'</b> | 7.14 ( <i>d</i> , <i>J</i> = 8.8 Hz)           | 116.8               | 7.32 ( <i>d</i> , <i>J</i> = 8.56 Hz)          | 116.2               |
| <b>4'</b> |                                                | 161.2               |                                                | 159.1               |
| <b>5'</b> |                                                | 120.1               | 7.32 ( <i>d</i> , <i>J</i> = 8.65 Hz)          | 116.2               |
| <b>6'</b> | 7.65 ( <i>d</i> , <i>J</i> = 8.56 Hz)          | 132.4               | 7.88 ( <i>d</i> , <i>J</i> = 8.8 Hz)           | 129.1               |

**Quercetin-3-*O*- $\beta$ -glucoside (8)**

**Table S6:**  $^1\text{H}$  (400 MHz) and  $^{13}\text{C}$  (100 MHz) NMR spectral data of compound **C8** in  $\text{CD}_3\text{OD}$

| No.        | $\delta_{\text{H}}$ ( <i>mult</i> , <i>J</i> ) | $\delta_{\text{C}}$ | $\delta_{\text{C}}$ (Lit. (Zhang <i>et al.</i> , 2014)) |
|------------|------------------------------------------------|---------------------|---------------------------------------------------------|
| <b>2</b>   |                                                | 157.05              | 156.79                                                  |
| <b>3</b>   |                                                | 134.36              | 133.99                                                  |
| <b>4</b>   |                                                | 178.14              | 177.97                                                  |
| <b>5</b>   |                                                | 161.61              | 161.71                                                  |
| <b>6</b>   | 6.23 ( <i>d</i> , <i>J</i> = 2.04 Hz)          | 98.53               | 99.16                                                   |
| <b>7</b>   |                                                | 164.74              | 164.66                                                  |
| <b>8</b>   | 6.42 ( <i>d</i> , <i>J</i> = 2.04 Hz)          | 93.34               | 93.98                                                   |
| <b>9</b>   |                                                | 157.40              | 156.79                                                  |
| <b>10</b>  |                                                | 104.22              | 104.39                                                  |
| <b>1'</b>  |                                                | 121.46              | 121.59                                                  |
| <b>2'</b>  | 7.86 ( <i>d</i> , <i>J</i> = 2.16 Hz)          | 116.39              | 115.67                                                  |
| <b>3'</b>  |                                                | 144.42              | 145.30                                                  |
| <b>4'</b>  |                                                | 148.56              | 148.95                                                  |
| <b>5'</b>  | 6.89 ( <i>d</i> , <i>J</i> = 8.52 Hz)          | 114.69              | 116.44                                                  |
| <b>6'</b>  | 7.62 ( <i>dd</i> , <i>J</i> = 2.16, 8.52 Hz)   | 121.53              | 122.46                                                  |
| <b>1''</b> | 5.17 ( <i>d</i> , <i>J</i> = 7.76 Hz)          | 103.99              | 102.33                                                  |
| <b>2''</b> | 3.58 ( <i>m</i> )                              | 71.77               | 71.70                                                   |
| <b>3''</b> | 3.84 ( <i>m</i> )                              | 73.68               | 73.69                                                   |
| <b>4''</b> | 3.87 ( <i>m</i> )                              | 68.60               | 68.41                                                   |
| <b>5''</b> | 3.49 ( <i>m</i> )                              | 75.77               | 76.32                                                   |
| <b>6''</b> | 3.65 ( <i>m</i> )                              | 60.52               | 60.62                                                   |

**$\alpha$  -Amyrin (9),  $\beta$ -Amyrin (10), and Lupeol (11)**

**Table S7:**  $^1\text{H}$  NMR (400 MHz) and  $^{13}\text{C}$  NMR (100 MHz) of compounds **C9**, **C10**, and **C11** in  $\text{CDCl}_3$

| No. | C9                            |                     | C10                           |                     | C11                           |                     |
|-----|-------------------------------|---------------------|-------------------------------|---------------------|-------------------------------|---------------------|
|     | $\delta_{\text{H}}$ (mult, J) | $\delta_{\text{C}}$ | $\delta_{\text{H}}$ (mult, J) | $\delta_{\text{C}}$ | $\delta_{\text{H}}$ (mult, J) | $\delta_{\text{C}}$ |
| 1   |                               | 38.8                |                               | 38.7                |                               | 38.6                |
| 2   |                               | 28.7                |                               | 27.2                |                               | 27.5                |
| 3   | 3.22 (dd, J = 5.2, 10.8 Hz)   | 79.06               | 3.21 (dd, J = 4.8, 10.5 Hz)   | 79.03               | 3.17(d, J = 5.1 Hz)           | 79.0                |
| 4   |                               | 38.7                |                               | 38.5                |                               | 39.8                |
| 5   | 0.76                          | 55.3                | 0.72                          | 55.3                | 0.69                          | 55.1                |
| 6   |                               | 18.4                |                               | 18.6                |                               | 19.0                |
| 7   |                               | 32.2                |                               | 32.4                |                               | 34.3                |
| 8   |                               | 40.7                |                               | 39.8                |                               | 41.7                |
| 9   |                               | 47.7                |                               | 47.6                |                               | 50.7                |
| 10  |                               | 36.6                |                               | 36.9                |                               | 37.2                |
| 11  |                               | 23.3                |                               | 23.6                |                               | 21.2                |
| 12  | 5.13 (t, J = 3.6 Hz)          | 124.4               | 5.19 (t, J = 3.5 Hz)          | 121.7               |                               | 25.3                |
| 13  |                               | 139.6               |                               | 145.2               |                               | 38.6                |
| 14  |                               | 42.1                |                               | 41.7                |                               | 42.8                |
| 15  |                               | 27.2                |                               | 26.2                |                               | 27.2                |
| 16  |                               | 26.6                |                               | 26.1                |                               | 35.9                |
| 17  |                               | 33.7                |                               | 32.6                |                               | 43.0                |
| 18  | 1.31                          | 59.1                | 1.54                          | 47.8                | 2.39                          | 48.3                |
| 19  |                               | 39.6                | 1.92                          | 47.3                |                               | 47.7                |
| 20  |                               | 39.6                |                               | 31.0                |                               | 150.9               |
| 21  |                               | 31.2                |                               | 34.7                |                               | 30.1                |
| 22  | 1.85                          | 41.5                |                               | 37.1                |                               | 40.8                |
| 23  | 0.83                          | 28.1                | 0.77                          | 28.0                | 0.80                          | 28.7                |
| 24  | 0.76                          | 15.6                | 0.90                          | 15.5                | 0.77                          | 15.7                |
| 25  | 0.73                          | 15.6                | 0.73                          | 15.4                | 0.84                          | 16.2                |
| 26  | 0.83                          | 16.9                | 0.93                          | 16.1                | 1.04                          | 16.1                |
| 27  | 1.01                          | 23.2                | 1.19                          | 25.9                | 0.96                          | 14.5                |
| 28  | 0.94                          | 28.1                | 1.07                          | 28.4                | 0.80                          | 18.1                |
| 29  | 0.79                          | 17.9                | 0.87                          | 33.8                | 4.69 (s)                      | 109.3               |
|     |                               |                     |                               |                     | 4.56 (s)                      |                     |
| 30  | 0.86                          | 19.4                | 0.80                          | 23.7                | 1.70                          | 19.8                |

## ANNEXURE ONE

### NMR SPECTRA OF COMPOUNDS ISOLATED FROM *RHUS LUCIDA*

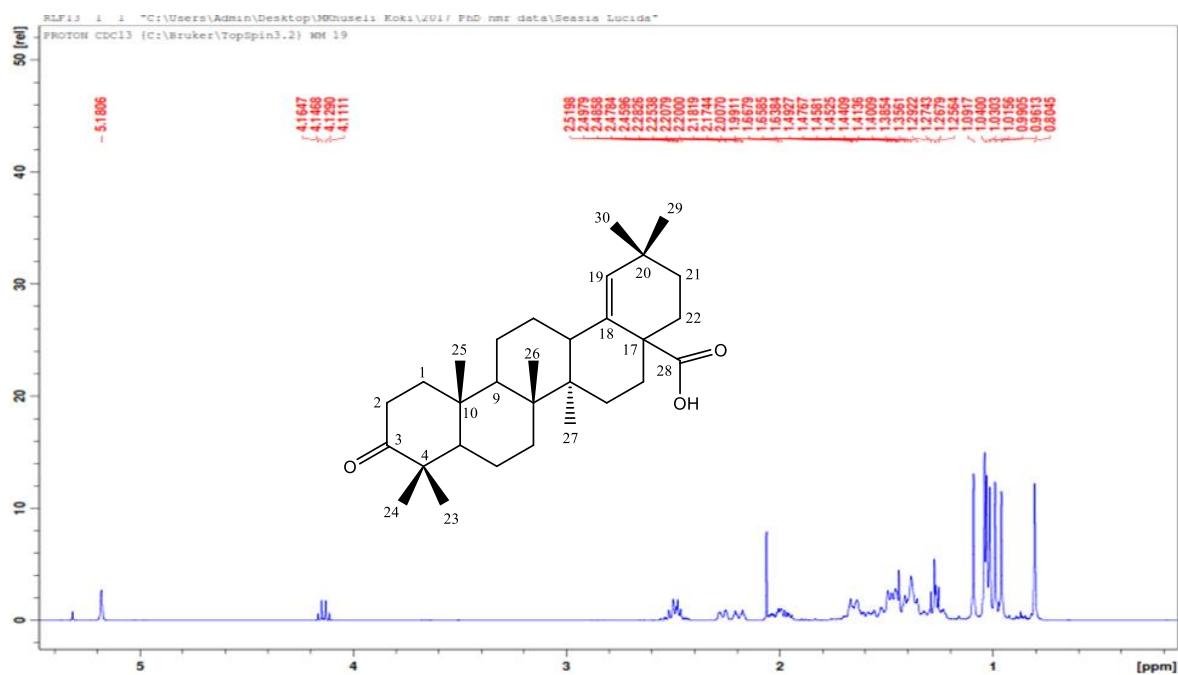

Figure S1: <sup>1</sup>H NMR moronic acid (C1) in CDCl<sub>3</sub>

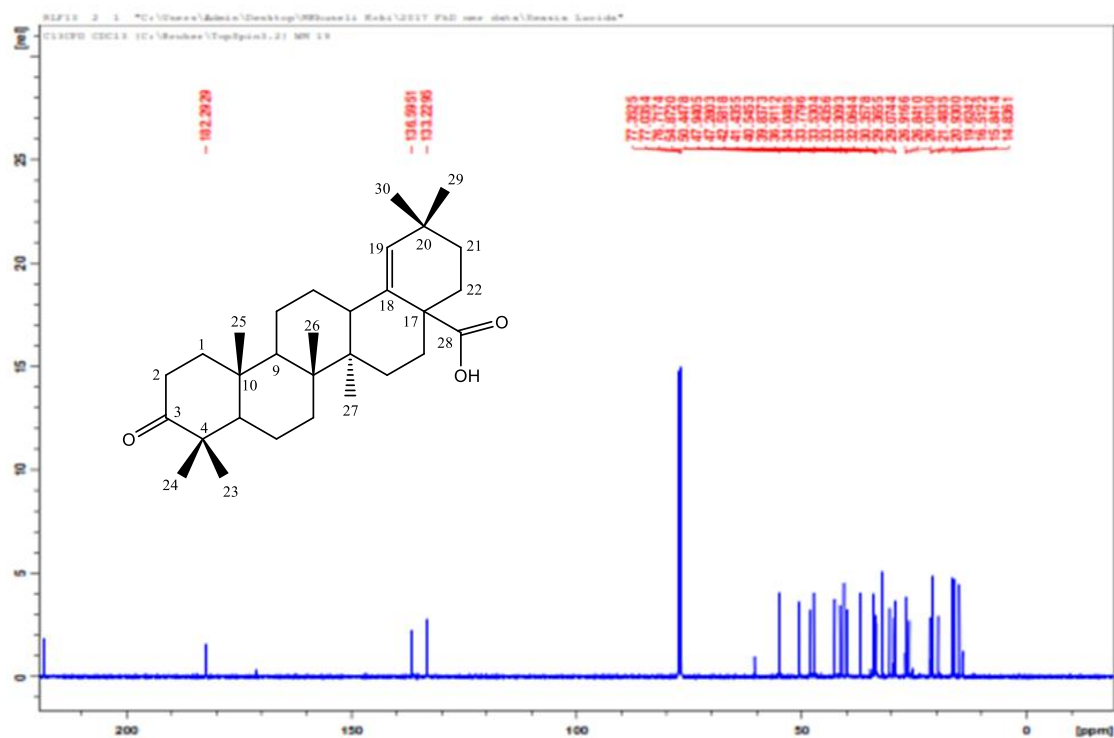

Figure S2: <sup>13</sup>C NMR of moronic acid (C1) in CDCl<sub>3</sub>



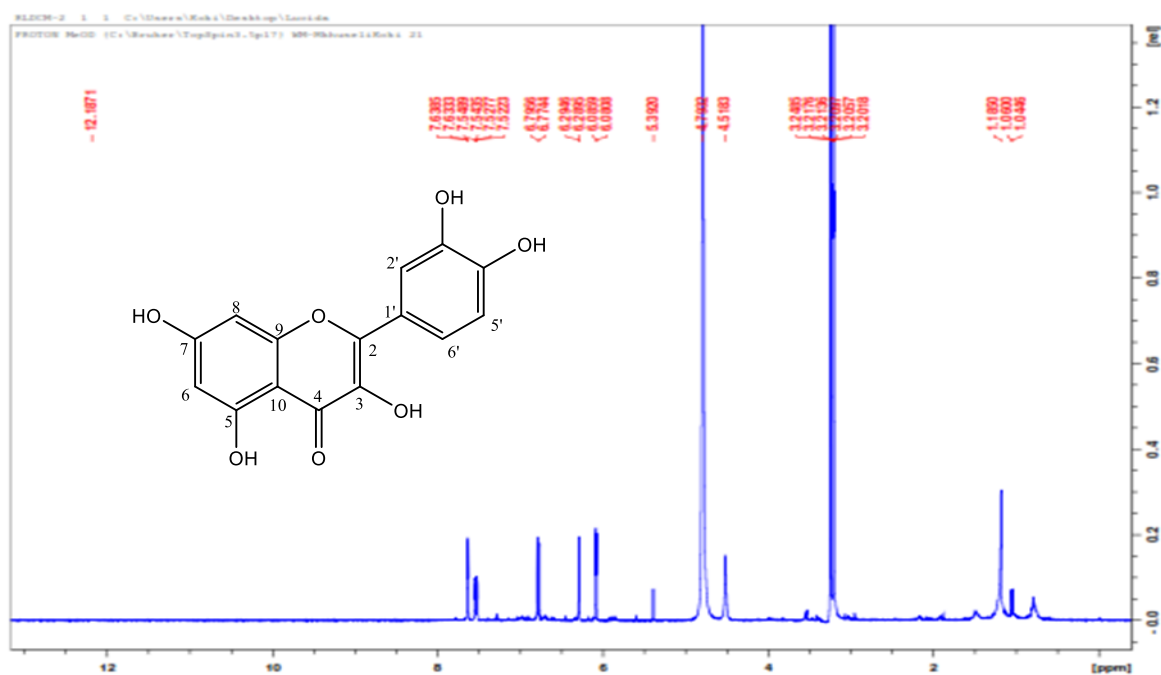

Figure S3:  $^1\text{H}$  NMR of quercetin (C5) in  $\text{CD}_3\text{OD}$

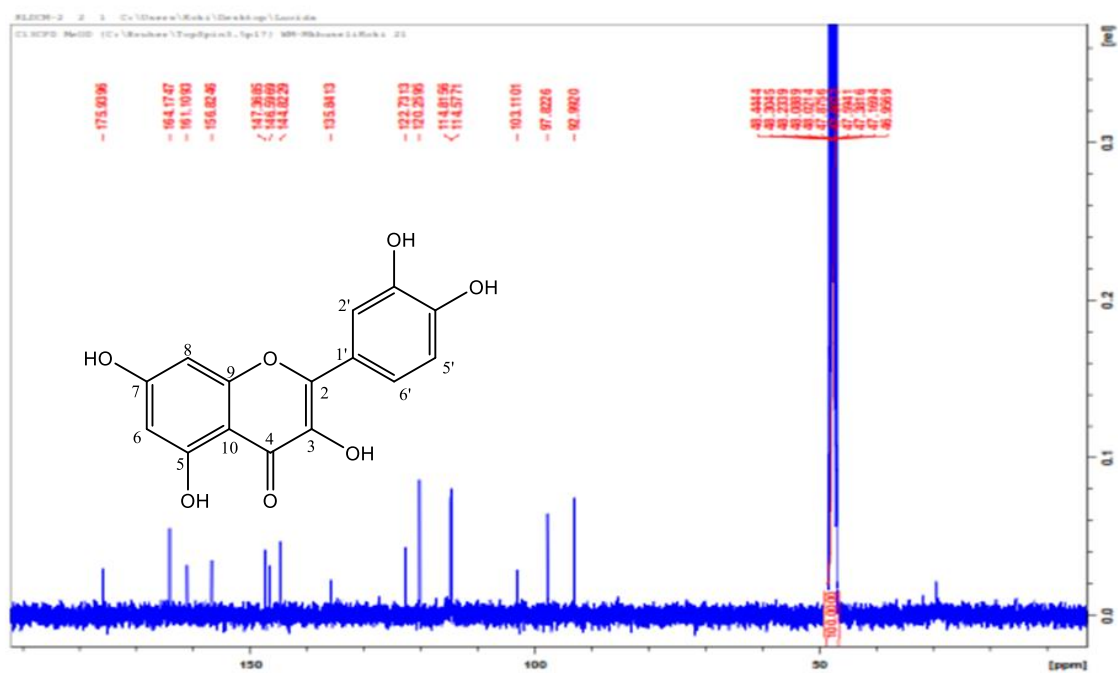

Figure S4:  $^{13}\text{C}$  NMR of quercetin C5 in  $\text{CD}_3\text{OD}$

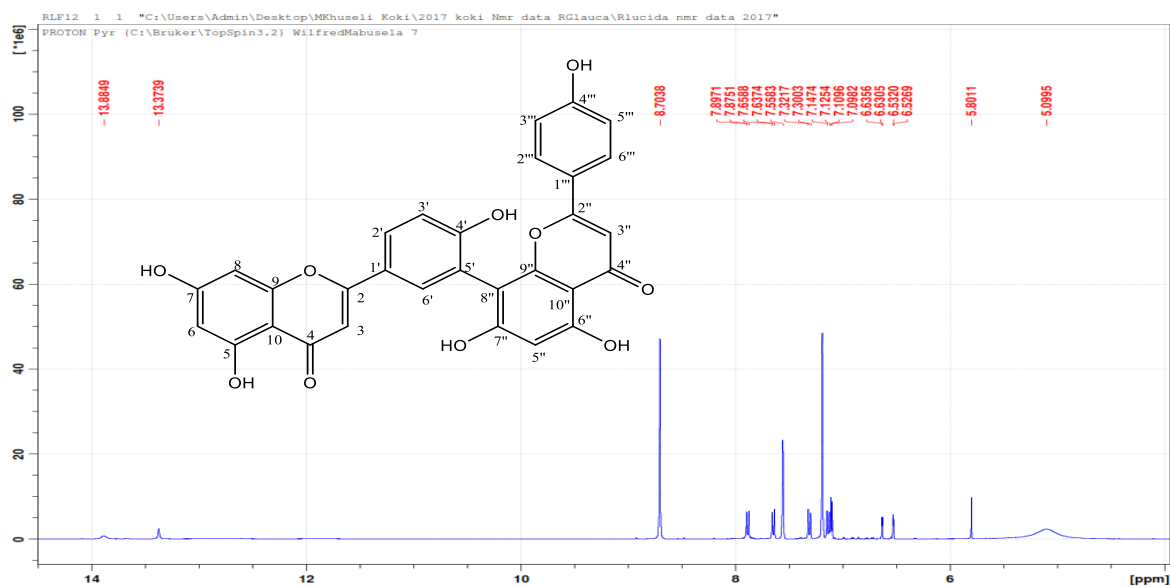

Figure S5:  $^1\text{H}$  NMR of amentoflavone (C7) in Pyridine- $\text{d}_5$

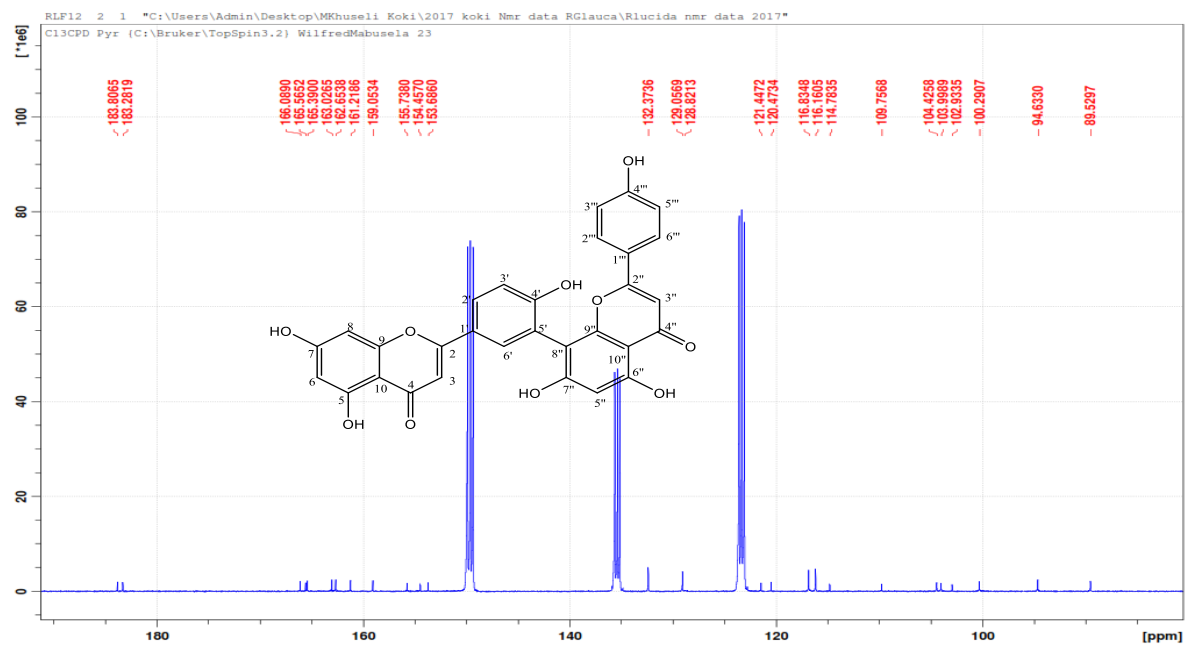

Figure S6:  $^{13}\text{C}$  NMR of amentoflavone (C7) in Pyridine- $\text{d}_5$

## ANNEXURE TWO

### NMR SPECTRA OF COMPOUNDS ISOLATED FROM *R. GLAUCA*

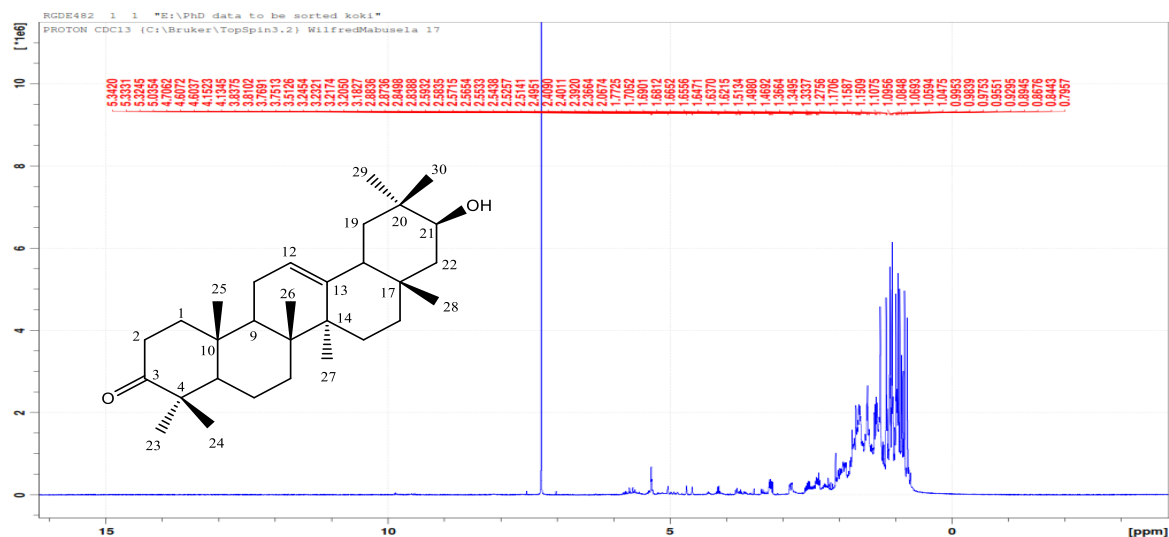

Figure S7:  $^1\text{H}$  NMR spectrum of 21- $\beta$ -hydroxylean-12-en-3-one (C2) in  $\text{CDCl}_3$

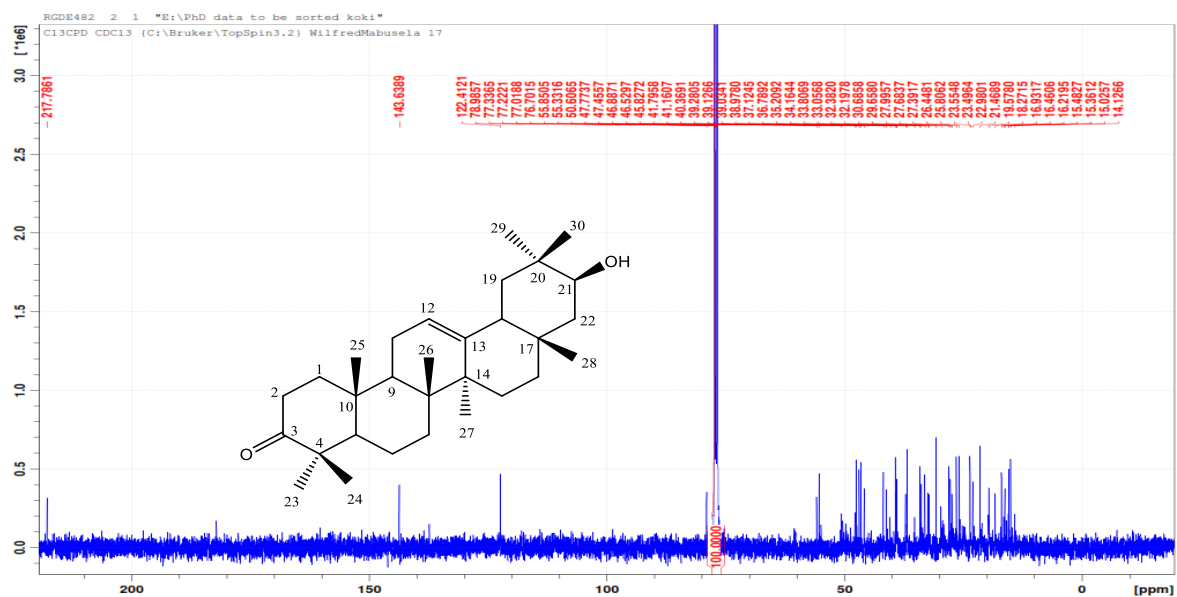

Figure S8:  $^{13}\text{C}$  NMR spectrum of 21- $\beta$ -hydroxylean-12-en-3-one (C2) in  $\text{CDCl}_3$

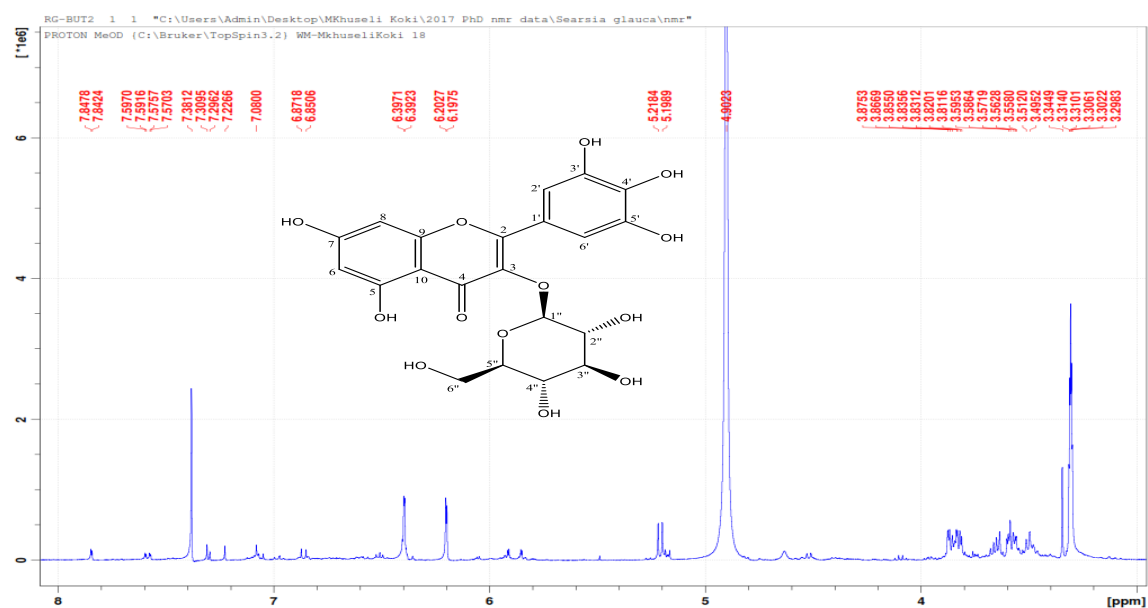

Figure S9:  $^1\text{H}$ -NMR of myricetin 3-O- $\beta$ -galactopyranoside (C3) in  $\text{CD}_3\text{OD}$

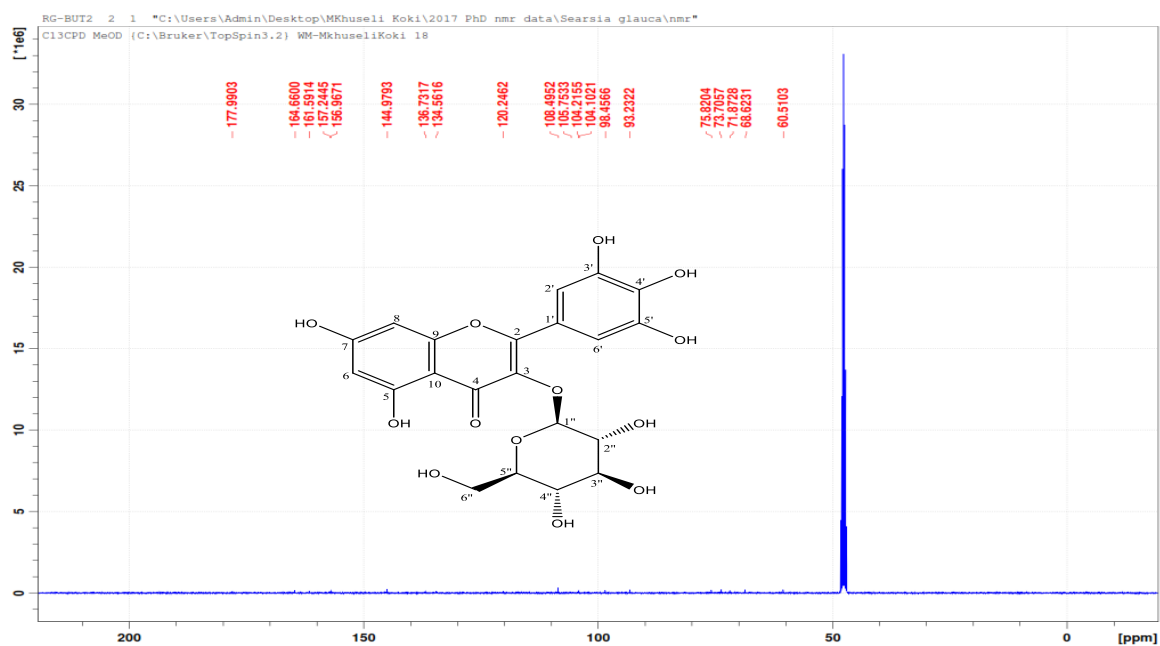

Figure S10:  $^{13}\text{C}$ -NMR of myricetin 3-O- $\beta$ -galactopyranoside (C3) in  $\text{CD}_3\text{OD}$

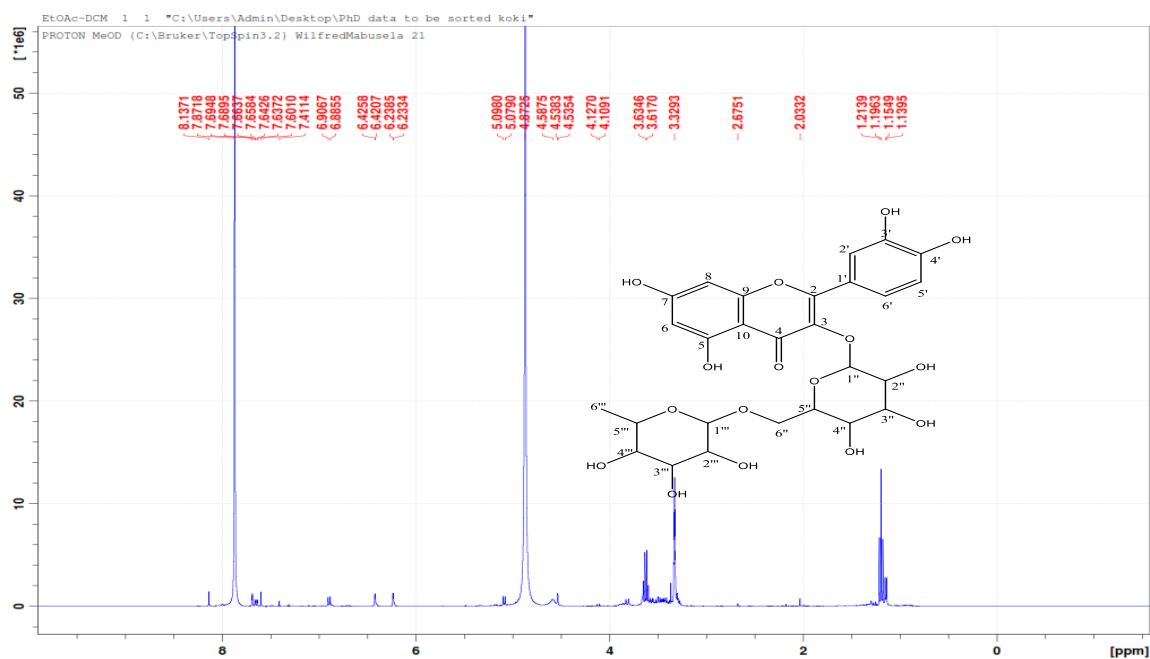

Figure S11:  $^1\text{H}$  NMR of Rutin (C4) in  $\text{CD}_3\text{OD}$

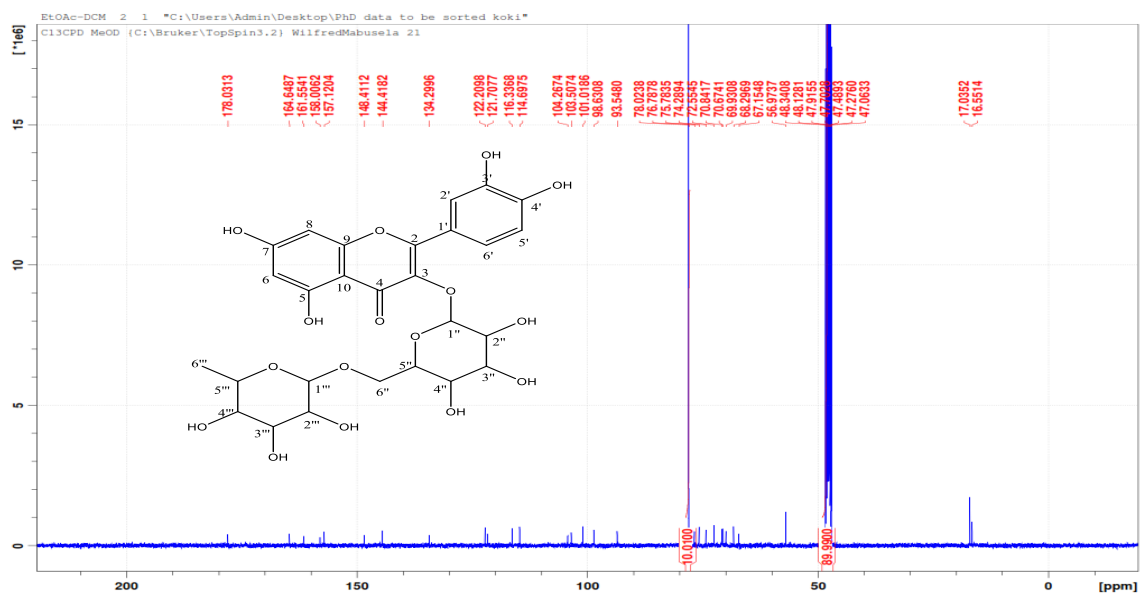

Figure S12:  $^{13}\text{C}$  NMR of Rutin (C4) in  $\text{CD}_3\text{OD}$

## ANNEXURE THREE

### NMR SPECTRA OF COMPOUNDS ISOLATED FROM *R. LAEVIGATA*

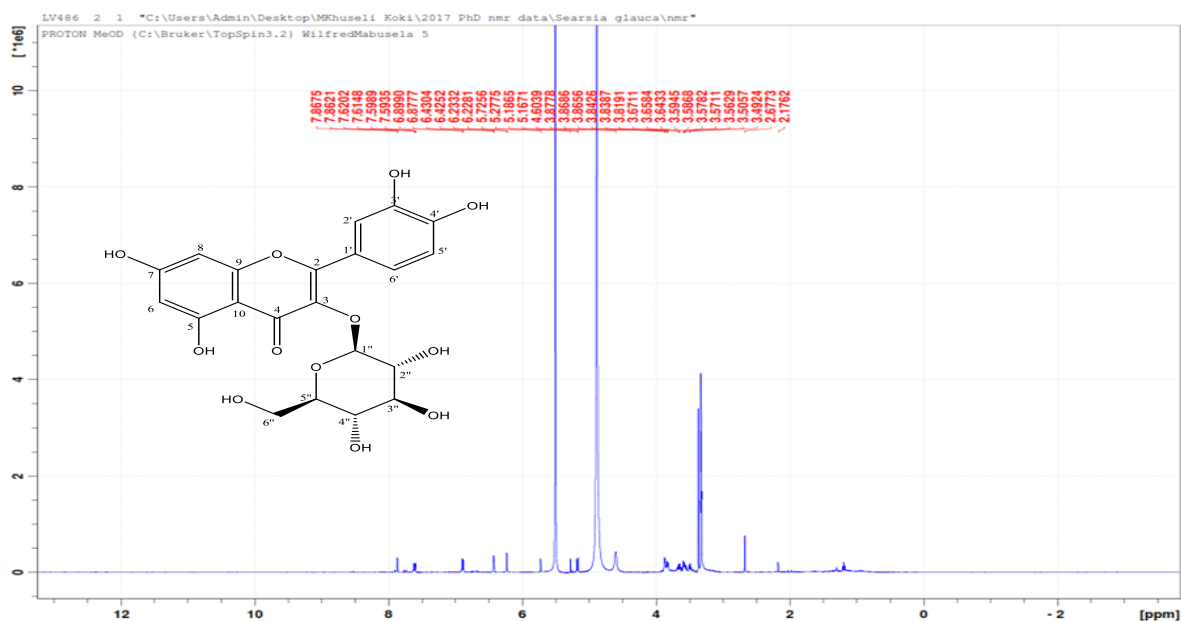

Figure S13:  $^1\text{H}$  NMR of Quercetin-3-O- $\beta$ -glucoside (C8) in  $\text{CD}_3\text{OD}$

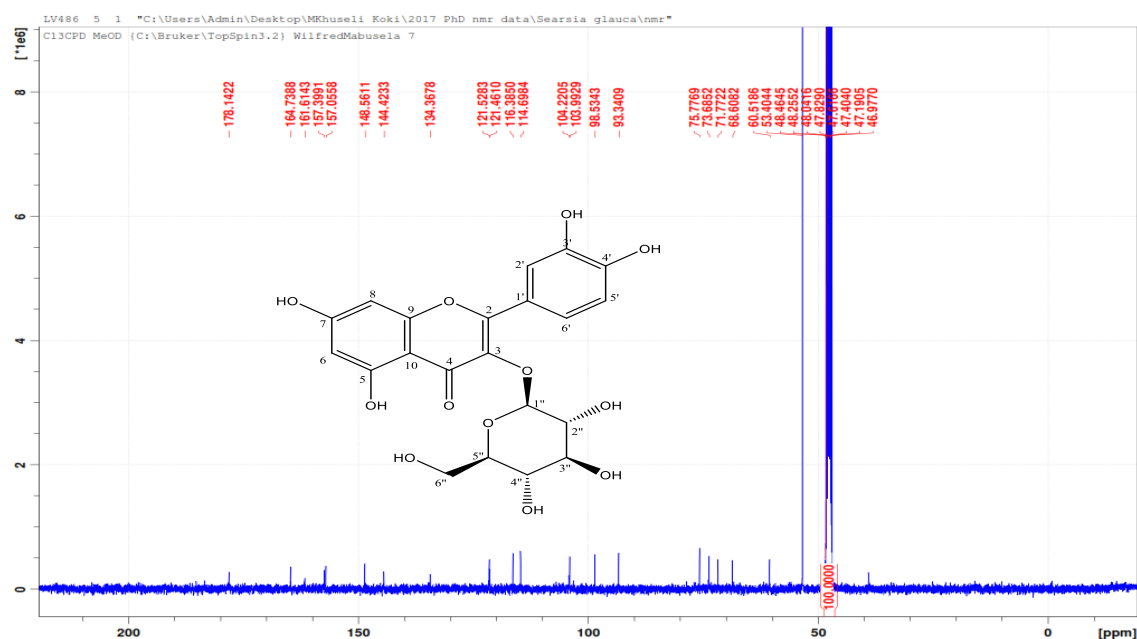

Figure S14:  $^{13}\text{C}$  NMR of Quercetin-3-O- $\beta$ -glucoside (C8) in  $\text{CD}_3\text{OD}$
